# Supplementary material for: Impact of Drying Process on the Phenolic Profile and Antioxidant Capacity of Raw and Boiled Leaves and Inflorescences of Chenopodium berlandieri ssp. berlandieri
Source: MDPI journal article supplement (doi:10.3390/molecules28207235), 2023-10-23
Supplement: s1 [file s1]

## Supplementary Material

### Impact of drying process on the phenolic profile and antioxidant capacity of raw and boiled leaves and inflorescences of *Chenopodium berlandieri* ssp. *berlandieri*

**Supplementary Table S1.** Phenolic compounds from *C. berlandieri* leaves and inflorescences, identified by UPLC-DAD-ESI-QToF/MS

| N°                           | Identified compounds                              | RT (min) | Molecular formula                               | Expected mass (Da) | Observed mass (Da) | Mass error (ppm) | Fragments                       |
|------------------------------|---------------------------------------------------|----------|-------------------------------------------------|--------------------|--------------------|------------------|---------------------------------|
| <i>Flavanols</i>             |                                                   |          |                                                 |                    |                    |                  |                                 |
| 1                            | Pro-cyanidin dimer B2*                            | 3.17     | C <sub>30</sub> H <sub>26</sub> O <sub>12</sub> | 578.1424           | 578.1404           | -3.5563          | 289.07178, 245.08154            |
| 2                            | (+)-Catechin*                                     | 3.39     | C <sub>15</sub> H <sub>14</sub> O <sub>6</sub>  | 290.0790           | 290.0784           | -2.0368          | 245.08178, 109.02922            |
| <i>Flavanones</i>            |                                                   |          |                                                 |                    |                    |                  |                                 |
| 3                            | Naringin*                                         | 4.87     | C <sub>27</sub> H <sub>32</sub> O <sub>14</sub> | 580.1792           | 580.1803           | 1.9308           | 151.00383                       |
| 4                            | Naringenin hexoside                               | 7.28     | C <sub>21</sub> H <sub>22</sub> O <sub>10</sub> | 434.1213           | 434.1217           | 0.8797           | 271.06143, 152.01138            |
| <i>Flavonols</i>             |                                                   |          |                                                 |                    |                    |                  |                                 |
| 5                            | Quercetin rhamnosyl-rhamnosyl-hexoside            | 3.84     | C <sub>33</sub> H <sub>40</sub> O <sub>20</sub> | 756.2113           | 756.2089           | -3.1834          | 300.02825, 178.99880, 151.00365 |
| 6                            | Quercetin pentosyl-rutinoside                     | 4.07     | C <sub>32</sub> H <sub>38</sub> O <sub>20</sub> | 742.1956           | 742.1938           | -2.5504          | 300.02847, 178.99886, 151.00379 |
| 7                            | Quercetin rutinoside (rutin)*                     | 4.73     | C <sub>27</sub> H <sub>30</sub> O <sub>16</sub> | 610.1534           | 610.1520           | -2.3359          | 300.02884, 178.99918, 151.00408 |
| 8                            | Quercetin hexoside                                | 5.03     | C <sub>21</sub> H <sub>20</sub> O <sub>12</sub> | 464.0955           | 464.0967           | 2.7193           | 300.02896, 178.02768            |
| 9                            | Kaempferol pentosyl-hexoside                      | 5.13     | C <sub>26</sub> H <sub>28</sub> O <sub>15</sub> | 580.1428           | 580.1432           | 0.6679           | 284.03376                       |
| 10                           | Quercetin pentoside                               | 5.41     | C <sub>20</sub> H <sub>18</sub> O <sub>11</sub> | 434.0849           | 434.0862           | 2.8964           | 300.02865, 179.03557, 150.03236 |
| 11                           | Kaempferol hexoside-rhamnoside                    | 5.93     | C <sub>27</sub> H <sub>30</sub> O <sub>15</sub> | 594.1585           | 594.1575           | -1.6472          | 285.04136                       |
| 12                           | (Iso)-rhamnetin hexoside                          | 6.70     | C <sub>22</sub> H <sub>22</sub> O <sub>12</sub> | 478.1111           | 478.1115           | 0.8259           | 314.04495, 151.00397            |
| 13                           | (Iso)-rhamnetin rutinoside                        | 9.98     | C <sub>22</sub> H <sub>22</sub> O <sub>11</sub> | 462.1162           | 462.1151           | -2.4323          | 315.05057                       |
| 14                           | Quercetin*                                        | 10.39    | C <sub>15</sub> H <sub>10</sub> O <sub>7</sub>  | 302.0427           | 302.0420           | -2.1363          | 178.99844, 151.00334, 107.01371 |
| 15                           | Kaempferol*                                       | 11.28    | C <sub>15</sub> H <sub>10</sub> O <sub>6</sub>  | 286.0477           | 286.0484           | 2.1699           | 152.01126                       |
| <i>Hydroxybenzoic acids</i>  |                                                   |          |                                                 |                    |                    |                  |                                 |
| 16                           | Vanillic acid*                                    | 2.43     | C <sub>8</sub> H <sub>8</sub> O <sub>4</sub>    | 168.0423           | 168.0417           | -3.5568          | 136.01586, 108.02128            |
| 17                           | Dihydroxybenzoic acid hexoside                    | 2.77     | C <sub>13</sub> H <sub>16</sub> O <sub>9</sub>  | 316.0794           | 316.0807           | 3.9727           | 153.01841, 109.02883            |
| 18                           | 4-Hydroxy-benzoic acid*                           | 2.92     | C <sub>7</sub> H <sub>6</sub> O <sub>3</sub>    | 138.0317           | 138.0312           | -3.7270          | 109.01557                       |
| 19                           | 3,4-Dihydroxy-benzoic acid (protocatechuic acid)* | 4.10     | C <sub>7</sub> H <sub>6</sub> O <sub>4</sub>    | 154.0266           | 154.0265           | -0.6641          | 153.01939, 137.02441, 109.02950 |
| <i>Hydroxycinnamic acids</i> |                                                   |          |                                                 |                    |                    |                  |                                 |
| 20                           | <i>p</i> -Coumaric acid*                          | 3.08     | C <sub>9</sub> H <sub>8</sub> O <sub>3</sub>    | 164.0473           | 164.0468           | -3.1319          | 119.05004                       |
| 21                           | Cinnamic acid*                                    | 4.20     | C <sub>9</sub> H <sub>8</sub> O <sub>2</sub>    | 148.0524           | 148.0523           | -0.8557          | 131.03771                       |
| 22                           | Ferulic acid hexoside                             | 4.80     | C <sub>16</sub> H <sub>20</sub> O <sub>9</sub>  | 356.1107           | 356.1112           | 1.2037           | 193.05123, 178.02775, 134.03753 |
| 23                           | Ferulic acid*                                     | 5.26     | C <sub>10</sub> H <sub>10</sub> O <sub>4</sub>  | 194.0579           | 194.0583           | 2.0288           | 178.02794, 134.03796            |

All ions were identified with the [M-H]<sup>-</sup> adduct. \* These compounds were confirmed with commercial standards.

**Supplementary Table S2.** Loading of each variable on each component from the PCA analysis for *C. berlandieri* ssp. *berlandieri* **(A)** leaves and **(B)** inflorescences.

| <b>(A)</b>    |            |            |            |            |            |            |            |            |
|---------------|------------|------------|------------|------------|------------|------------|------------|------------|
|               | <b>PC1</b> | <b>PC2</b> | <b>PC3</b> | <b>PC4</b> | <b>PC5</b> | <b>PC6</b> | <b>PC7</b> | <b>PC8</b> |
| TPC           | 0.082      | 0.290      | -0.308     | -0.003     | 0.105      | -0.060     | -0.038     | -0.197     |
| TF            | 0.247      | 0.078      | -0.184     | 0.021      | 0.122      | -0.041     | 0.010      | -0.131     |
| DPPH          | 0.145      | 0.251      | -0.270     | 0.112      | 0.114      | 0.060      | -0.060     | 0.900      |
| ABTS          | -0.033     | 0.355      | -0.046     | 0.215      | -0.074     | -0.025     | 0.345      | -0.010     |
| FRAP          | 0.124      | -0.234     | 0.289      | 0.236      | -0.155     | 0.115      | 0.161      | 0.125      |
| CAT           | 0.220      | 0.155      | -0.191     | -0.061     | 0.125      | 0.275      | -0.116     | -0.170     |
| Nar           | -0.204     | 0.238      | 0.026      | 0.129      | -0.084     | -0.003     | -0.085     | -0.037     |
| Nar-Hex       | -0.037     | 0.343      | 0.119      | -0.094     | -0.374     | 0.135      | -0.113     | -0.011     |
| Quer-Rham-Hex | 0.265      | 0.008      | -0.080     | 0.084      | -0.019     | -0.069     | -0.111     | -0.080     |
| Quer-Pent-Rut | 0.179      | 0.173      | 0.302      | -0.039     | -0.230     | -0.036     | -0.331     | 0.028      |
| Quer-Rut      | -0.009     | 0.100      | 0.254      | -0.545     | 0.184      | 0.569      | 0.080      | 0.062      |
| Quer-Hex      | 0.253      | 0.046      | -0.076     | 0.177      | 0.006      | 0.233      | 0.285      | -0.096     |
| Kaem-Pent     | 0.241      | -0.147     | 0.109      | -0.040     | -0.006     | -0.113     | 0.218      | 0.063      |
| Quer-Pent     | -0.198     | 0.220      | 0.053      | 0.225      | 0.194      | 0.005      | 0.109      | -0.059     |
| Kaem-Hex      | 0.196      | 0.169      | 0.248      | -0.050     | -0.251     | -0.166     | -0.346     | 0.021      |
| Iso-Rham-Hex  | -0.042     | 0.313      | 0.256      | -0.023     | -0.209     | -0.237     | 0.419      | 0.069      |
| Iso-Rham-Rut  | 0.242      | 0.069      | 0.103      | -0.226     | 0.131      | -0.244     | 0.039      | 0.003      |
| Quer          | 0.237      | 0.071      | 0.193      | 0.091      | -0.008     | 0.360      | 0.273      | -0.016     |
| Kaem          | 0.242      | -0.125     | 0.040      | 0.177      | -0.214     | -0.008     | -0.026     | 0.012      |
| VA            | -0.058     | -0.013     | 0.424      | 0.230      | 0.606      | -0.111     | -0.167     | 0.031      |
| Dih-Hex       | 0.196      | 0.215      | 0.162      | 0.036      | 0.232      | -0.259     | 0.185      | -0.047     |
| HBA           | -0.199     | -0.083     | 0.209      | 0.359      | -0.054     | 0.212      | -0.124     | 0.057      |
| PA            | 0.238      | -0.108     | 0.098      | 0.236      | 0.037      | 0.146      | -0.061     | -0.027     |
| Coum          | 0.171      | 0.274      | 0.118      | 0.036      | 0.189      | 0.044      | -0.254     | -0.117     |
| Cinn          | -0.209     | 0.225      | -0.015     | 0.146      | 0.059      | 0.134      | -0.103     | -0.075     |
| FAH           | 0.249      | -0.114     | 0.024      | -0.160     | 0.074      | -0.137     | 0.022      | 0.020      |
| FA            | 0.231      | -0.017     | -0.167     | 0.292      | -0.071     | 0.173      | -0.135     | -0.130     |
| <b>(B)</b>    |            |            |            |            |            |            |            |            |
|               | <b>PC1</b> | <b>PC2</b> | <b>PC3</b> | <b>PC4</b> | <b>PC5</b> | <b>PC6</b> | <b>PC7</b> | <b>PC8</b> |
| TPC           | 0.209      | 0.080      | -0.230     | -0.140     | -0.002     | -0.158     | 0.028      | 0.038      |
| TF            | 0.221      | -0.077     | -0.022     | -0.025     | 0.029      | -0.062     | -0.070     | -0.016     |
| DPPH          | 0.222      | -0.027     | -0.050     | -0.120     | 0.022      | -0.021     | -0.052     | -0.003     |
| ABTS          | 0.146      | 0.281      | -0.305     | 0.001      | 0.285      | 0.103      | 0.205      | -0.272     |
| FRAP          | 0.207      | -0.048     | -0.066     | 0.274      | 0.289      | 0.333      | 0.280      | 0.776      |
| Cyanidin B2   | 0.219      | -0.028     | 0.135      | -0.028     | 0.051      | -0.011     | 0.393      | -0.194     |
| CAT           | 0.224      | -0.006     | 0.009      | -0.054     | 0.016      | -0.067     | 0.165      | -0.077     |
| Nar           | -0.200     | 0.192      | 0.070      | -0.020     | -0.095     | 0.079      | 0.202      | 0.007      |
| Nar-Hex       | 0.223      | 0.023      | -0.056     | -0.003     | 0.022      | 0.044      | -0.175     | -0.025     |
| Quer-Rham-Hex | 0.139      | 0.294      | -0.058     | -0.353     | 0.002      | 0.435      | -0.375     | 0.049      |
| Quer-Pent-Rut | 0.209      | -0.090     | 0.139      | 0.228      | -0.092     | -0.167     | -0.193     | 0.046      |
| Quer-Rut      | 0.210      | -0.074     | 0.160      | 0.236      | 0.088      | -0.045     | -0.175     | -0.080     |
| Quer-Hex      | 0.178      | 0.252      | -0.026     | 0.188      | -0.087     | 0.257      | -0.072     | -0.152     |
| Kaem-Pent     | -0.167     | 0.273      | 0.142      | -0.176     | -0.083     | 0.177      | 0.173      | 0.028      |
| Quer-Pent     | 0.199      | 0.180      | 0.104      | -0.094     | -0.229     | -0.014     | 0.292      | -0.014     |
| Kaem-Hex      | 0.216      | 0.031      | 0.155      | -0.037     | -0.266     | -0.135     | -0.129     | 0.174      |
| Iso-Rham-Hex  | 0.143      | 0.321      | -0.044     | 0.141      | -0.387     | 0.037      | 0.091      | 0.024      |
| Iso-Rham-Rut  | 0.218      | 0.077      | 0.061      | -0.054     | -0.197     | -0.042     | -0.048     | 0.080      |
| Quer          | 0.196      | -0.034     | 0.345      | 0.243      | -0.075     | 0.099      | 0.025      | -0.134     |
| Kaem          | 0.218      | -0.017     | -0.164     | 0.048      | 0.145      | 0.085      | 0.162      | -0.239     |
| VA            | -0.077     | 0.309      | -0.271     | 0.560      | 0.092      | 0.031      | -0.294     | -0.122     |
| Dih-Hex       | -0.200     | -0.073     | 0.258      | 0.293      | -0.074     | 0.108      | -0.045     | -0.035     |
| HBA           | 0.004      | 0.406      | 0.085      | -0.008     | 0.428      | -0.610     | -0.013     | 0.141      |
| PA            | 0.191      | 0.193      | 0.197      | -0.143     | -0.042     | -0.158     | -0.170     | 0.173      |

|      |        |        |       |        |        |        |        |        |
|------|--------|--------|-------|--------|--------|--------|--------|--------|
| Coum | -0.112 | 0.225  | 0.526 | -0.141 | 0.395  | 0.223  | -0.147 | -0.052 |
| Cinn | -0.204 | 0.171  | 0.059 | 0.123  | -0.050 | -0.062 | 0.242  | -0.015 |
| FAH  | -0.148 | 0.319  | 0.018 | 0.140  | -0.277 | -0.130 | 0.085  | 0.140  |
| FA   | 0.203  | -0.032 | 0.314 | 0.138  | 0.135  | 0.030  | 0.171  | -0.203 |

**CAT:** (+)-catechin; **Coum:** Coumaric acid; **Cinn:** Cinnamic acid; **Dih-Hex:** Dihydroxybenzoic acid hexoside; **FA:** Ferulic acid; **FAH:** Ferulic acid hexoside; **HBA:** 4-hydroxybenzoic acid; **Iso-Rham-Hex:** (Iso)-rhamnetin-hexoside; **Iso-Rham-Rut:** (Iso)-rhamnetin-rutinoside; **Kaem:** Kaempferol; **Kaem-Hex:** Kaempferol-hexoside; **Nar:** Naringin; **Nar-Hex:** Naringenin-hexoside; **PA:** 3,4-dihydroxybenzoic acid (protocatechuic acid); **PC:** Principal component; **Que:** Quercetin; **Quer-Hex:** Quercetin-hexoside; **Quer-Pent-Rut:** Quercetin-pentosyl-rutinoside; **Quer-Rham-Hex:** Quercetin-rhamnosyl-rhamnosyl-hexoside; **Quer-Rut:** Quercetin-rutinoside; **TF:** Total flavonoids; **TPC:** Total phenolic compounds; **VA:** Vanillic acid.
